# Supplementary material for: Effects of a ketogenic diet on the quality of life in 16 patients with advanced cancer: A pilot trial
Source: Springer Nature journal article supplement (doi:10.1186/1743-7075-8-54), 2011-07-27
Supplement: 12986_2011_352_MOESM2_ESM.pdf [file 12986_2011_352_MOESM2_ESM.pdf]

## Enrollment

Assessed for eligibility (n>100)  
Baseline interview either on  
the phone or personally

### Excluded (>80%)

- Not meeting inclusion criteria (65%)  
Currently receiving chemotherapy or  
no measurable tumor lesions
- Refusal to participate (10%)  
Changes in lifestyle considered too radical
- Other reasons (5%)  
personal problems  
too expensive  
not the right time for a change in lifestyle

Enrolled in study (n=16)

## Allocation

Allocated to dietary intervention (n= 16)

- ◆ Received dietary intervention for at least 4 weeks (n=13)
- ◆ Did not receive dietary intervention (give reasons) (n=3)
  - n=2: unable to stick to diet
  - n=1: death from progressive disease after 2 weeks

## Follow-Up

- Received dietary intervention for the complete duration of the study (n= 5)
- Discontinued intervention (n=8)
  - n=1: unable to stick to diet
  - n=6: progressive disease
  - n=1: death from progressive disease

## Analysis

- Analysed if dietary intervention lasted for at least 8 weeks and if EORTC-QLQ C30 was completed for at least 8 weeks (n=7)
- Excluded from analysis (n=9)
  - n=8 intervention discontinued early
  - n=1 EORTC-QLQ C30 not completed
