# Supplementary figures and images for: Effects of a ketogenic diet on the quality of life in 16 patients with advanced cancer: A pilot trial
Source: Springer Nature journal article supplement (doi:10.1186/1743-7075-8-54), 2011-07-27

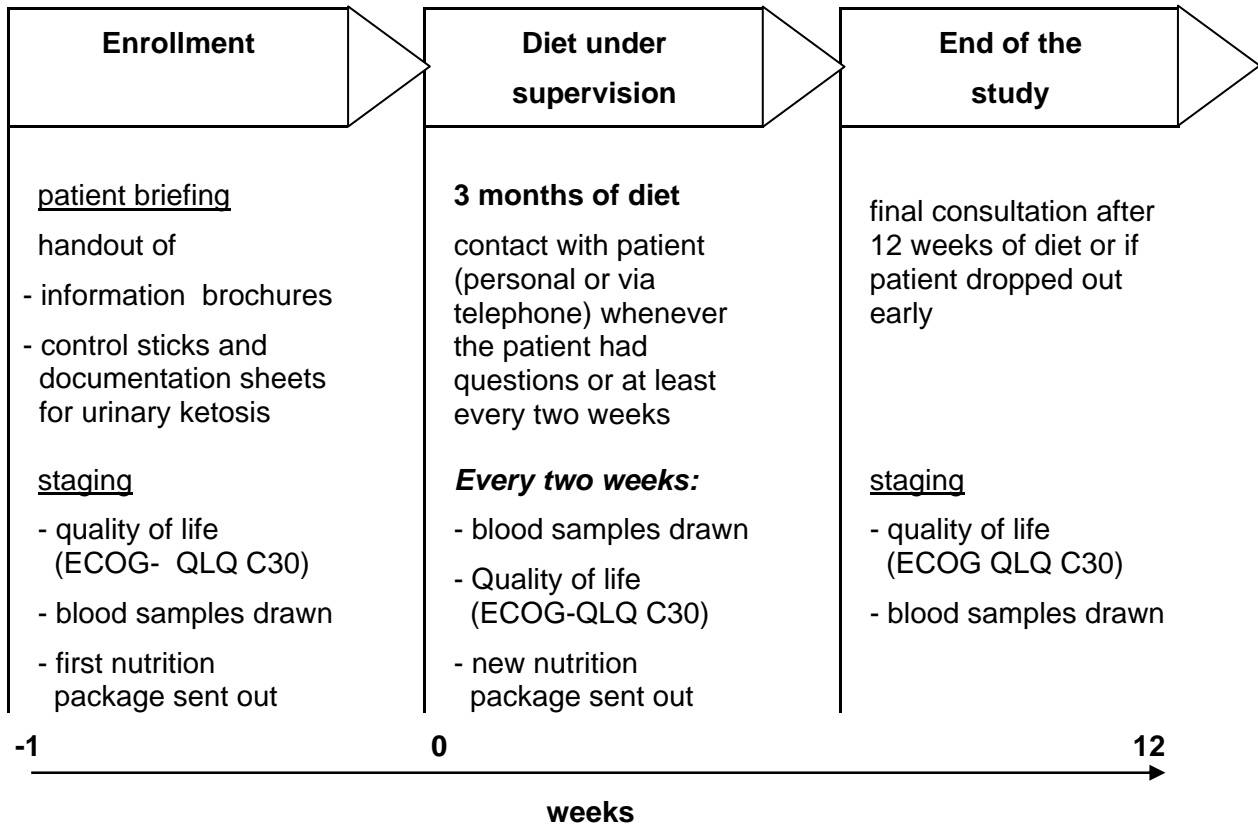

Supplement: 12986_2011_352_MOESM1_ESM.pdf [file 12986_2011_352_MOESM1_ESM.pdf]

### global scores

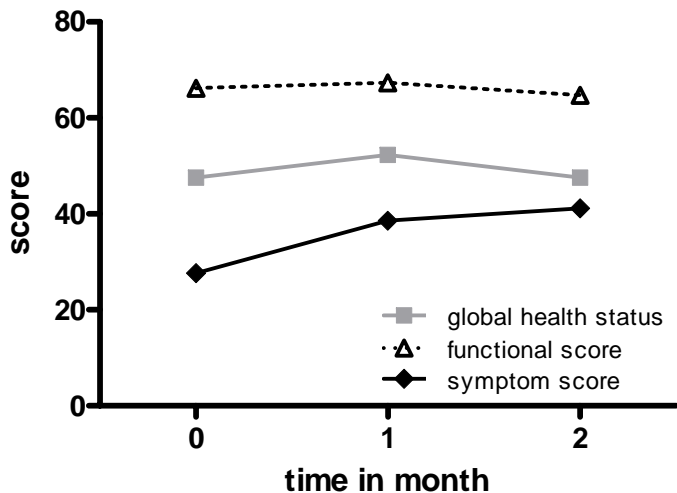

### functional scores

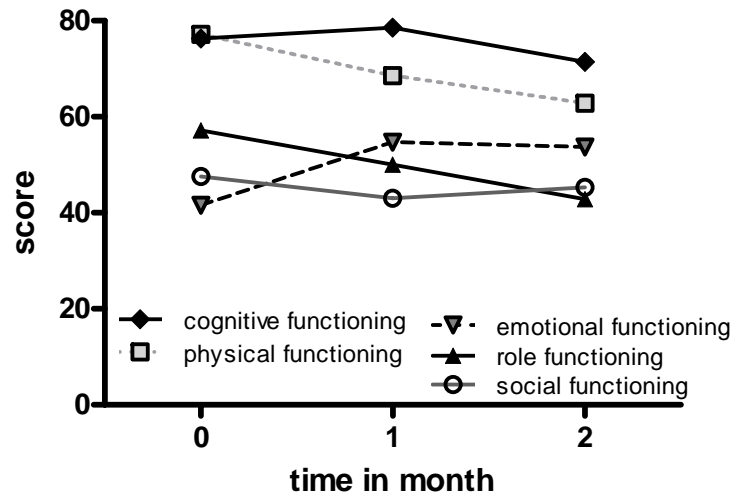

### symptom score: digestive functions

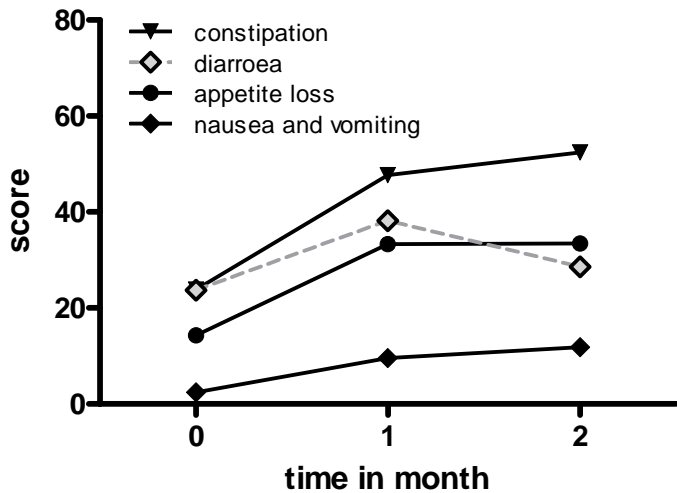

### symptom score: other

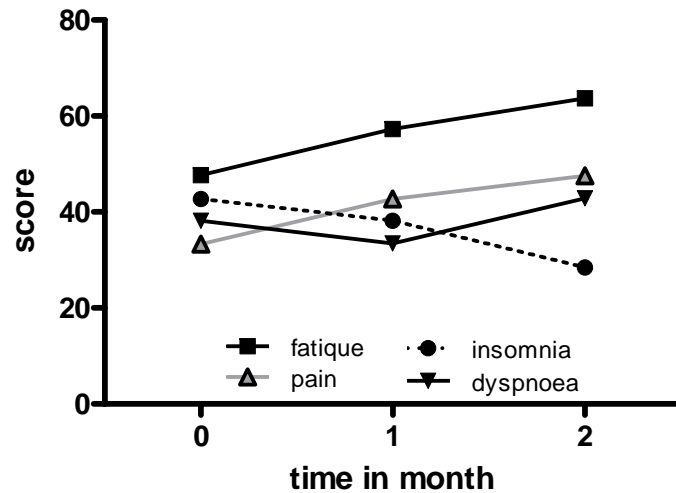

Supplement: 12986_2011_352_MOESM4_ESM.pdf [file 12986_2011_352_MOESM4_ESM.pdf]
